# Supplementary material for: Ketalized poly(amino ester) for stimuli-responsive and biocompatible gene delivery
Source: Royal Society of Chemistry journal article supplement (doi:10.1039/c2py20344h), 2012-01-01
Supplement: c2py20344h.pdf [file c2py20344h.pdf]

## Electronic Supplementary Information

# Ketalized Poly(amino ester) for Stimuli-Responsive and Biocompatible Gene Delivery

Min Suk Shim<sup>a</sup> and Young Jik Kwon<sup>a,b,c,d\*</sup>

<sup>a</sup>Department of Chemical Engineering and Materials Science, University of California, Irvine, CA 92697, USA; <sup>b</sup>Department of Pharmaceutical Sciences, University of California, Irvine, CA 92697, USA; <sup>c</sup>Department of Biomedical Engineering, University of California, Irvine, CA 92697, USA; <sup>d</sup>Department of Molecular Biology and Biochemistry, University of California, Irvine, CA 92697, USA

### 1. Characterization of K-PAE by <sup>1</sup>H NMR spectroscopy

Structure of K-PAE was confirmed by the peaks for methylene protons of diaminoethane (e, f, i, and j) and the peaks for methylene protons of ethylene glycol (peak: d, o, and p) in <sup>1</sup>H NMR spectrum (Fig. S1). The peak for methylene protons adjacent to the ester (peak: c) and the sharp singlet peak for the methyl protons of ketal linkage (peak: q) represent the stimuli-cleavable structure of K-PAE and were used to qualify the hydrolysis kinetics under various conditions.

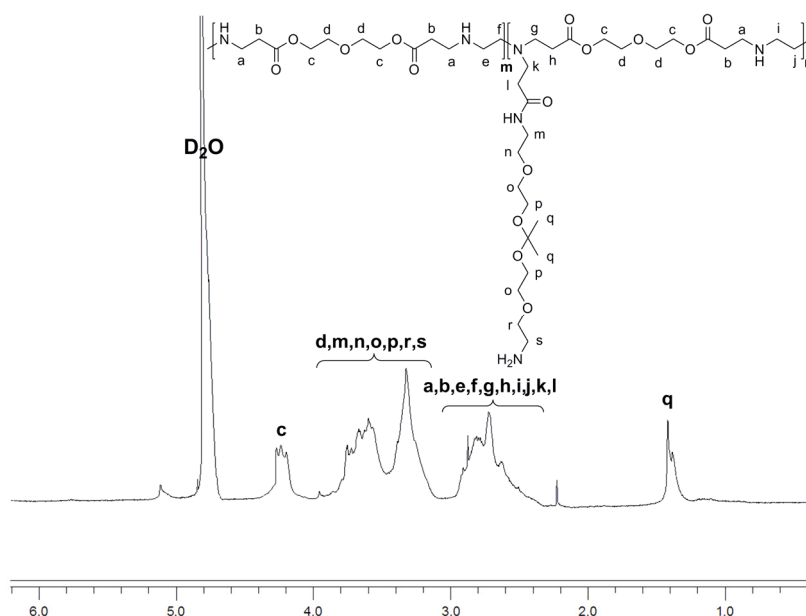

Fig. S1. <sup>1</sup>H NMR spectrum of K-PAE.

## 2. Transfection efficiency and cytotoxicity of DNA/K-PAE polyplexes at various N/P ratios

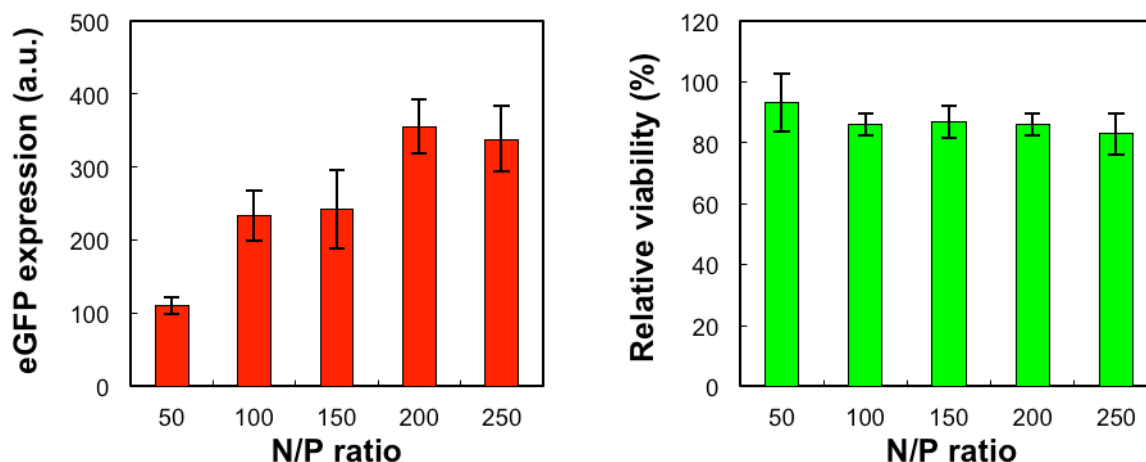

**Fig. S2.** eGFP expression and relative viability of NIH 3T3 cells incubated with DNA/K-PAE polyplexes at various N/P ratios. The highest gene expression by DNA/K-PAE polyplexes was obtained at an N/P ratio of 200 where the most efficient DNA condensation was observed (Fig. 1).

## 3. Cellular uptake of DNA/K-PAE and DNA/NK-PAE polyplexes

1  $\mu\text{g}$  of Alexa Fluor 488-labeled DNA (AF488-DNA) was mixed with K-PAE or non-ketalized poly(amino ester) (NK-PAE) in DI water (50  $\mu\text{L}$  in total) at their optimum N/P ratios of 200. NIH 3T3 cells were seeded in a 24-well plate ( $5 \times 10^4$  cells/well), 24 h before transfection. Each polyplex solution was added to the cells with 250  $\mu\text{L}$  of FBS-free DMEM. After the cells were incubated for 4 h at 37  $^\circ\text{C}$  and harvested, the fluorescence intensity of AF488-DNA in the cell was quantified by a Guava EasyCyte Plus flow cytometer.

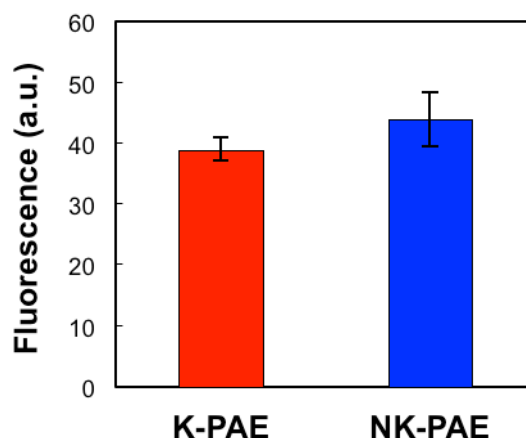

**Fig. S3.** Cellular uptake of AF488-DNA/K-PAE and AF488-DNA/NK-PAE polyplexes by NIH 3T3 cells. DNA/K-PAE polyplexes were internalized slightly less efficiently than DNA/NK-PAE polyplexes, due to lower DNA complexation efficiency.

#### 4. Effect of ketalization ratios on transfection efficiency

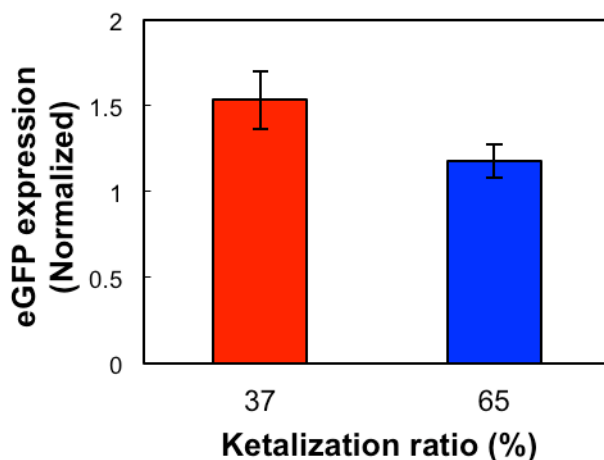

**Fig. S4.** Ketalization effects on transfection by DNA/K-PAE polyplexes. DNA was complexed with 37 and 65% ketalized K-PAE at N/P ratios of 200 and 280 (determined by the maximum transfection), respectively. 65% ketalized K-PAE was prepared by conjugating 3 equivalent of Cbz-protected amino ketal acrylamide (compound 6 in Scheme 1) with 1 equivalent of amino groups in poly(amino ester). eGFP expression in NIH 3T3 cells that were transfected by the polyplexes of DNA and differentially ketalized K-PAE was normalized by the transfection efficiency of NK-PAE.

#### 5. Intracellular disassembly of DNA/NK-PAE polyplexes

NIH 3T3 cells were seeded at a density of  $2 \times 10^4$  cells/well in a Falcon 8-well, 24 h prior to transfection. NK-PAE complexing Alexa Fluor 488 labeled-DNA in 500  $\mu$ L of DI water at the optimum N/P ratio of 200 was further labeled with Alexa Fluor 555 dye and purified by size-exclusion column chromatography. 250  $\mu$ L of polyplex solution in DMEM (0.5  $\mu$ g of the labeled DNA) was added to the cells and incubated for 8 h. After the cells were fixed and nuclei-counterstained, they were observed by confocal microscopy.

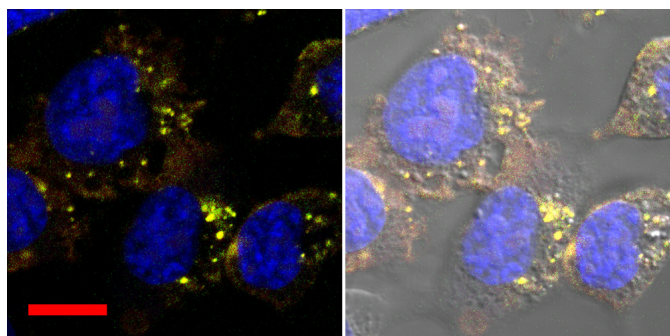

**Fig. S5.** Fluorescence and merged DIC/fluorescence micrographs of NIH 3T3 cells incubated with DNA/NK-PAE polyplexes for 8 h. (DNA: green dots; polymer: red dots; co-localized DNA and polymer: yellow dots). Scale bar = 10  $\mu$ m.
